# Supplementary material
Source: PubMed Central journal article supplement (PMC2688894)
Supplement: 0812879106_0812879106SI.pdf [file 0812879106_0812879106SI.pdf]

# Supporting Information

## Mythreya and Blobel 10.1073/pnas.0812879106

### SI Methods

**Cell Culture, Transfection, Adenoviral Infection and Reagents.** Phosphorylated Smad2 (pSmad2), Smad2, Cdc42, and Rac1 antibodies were from Cell Signaling Technology (Catalog Nos. 3101, 3103, 2462, 2465) and pan-neutralizing-TGF- $\beta$  antibody was obtained from R&D Systems. GST-PAK-CRIB-fusion protein was purified as previously described (1). GFP-tagged N17Cdc42 and N17Rac1 recombinant adenoviruses were obtained from George E. Davis (University of Missouri-Columbia, Columbia, MO) and prepared as described (2). Titers of virus ranged between  $10^9$  to  $10^{14}$  infectious units per mL. All adenoviral infections were done at a multiplicity of infection of 50 for all constructs.  $\beta$ -arrestin2-knockdown experiments were conducted using the siRNA sequence targeting human  $\beta$ -arrestin2 (3).

siRNA to Smad2 was performed using the ON-TARGET plus siRNA target sequence GAAUUGAGCCACAGAGUAA to human Smad2 from Dharmacon. Cells were transfected for 48 h with either siRNA to Smad2 or control before harvesting for Western analyses and migration assays as described in *Materials and Methods*.

**Immunofluorescence.** The cells were fixed in 4% paraformaldehyde and permeabilized with 0.1% Triton X for 5 min. Blocking was performed with 1% BSA, and cells were then incubated with a 1:50 dilution of phalloidin conjugated to either Texas Red (Molecular Probes) or Alexa 488 for 20 min. Immunofluorescence images were obtained using a Nikon inverted microscope.

**Transwell Migration Assays.** The pharmacological reagents, including 1  $\mu$ M of cytochalasin D, 100  $\mu$ M of blebbistatin, 10  $\mu$ g/mL of pan-neutralizing-TGF- $\beta$  antibody, 40–60 ng of soluble form of T $\beta$ RIII (sT $\beta$ RIII), or 3  $\mu$ M of the ALK5 inhibitor, SB431542, were added at the time of seeding onto the top chambers of the transwell filters. For Nocodazole treatment, cells were pretreated for 1 h with 20  $\mu$ M before conducting migration assays.

**Live Cell Imaging.** A Zeiss Axio Observer Z1 motorized microscope equipped with 20, 40, and 100 $\times$  objective lenses was used for the imaging. Time-lapse recording started either 24 h or 48 h

(for infected cells) after plating. The images were collected at 1-min intervals over 120 min with a cooled charge-coupled device (CCD) video camera (Coolsnap ES high resolution CCD camera) operated by Metamorph image analysis software (Molecular Devices). The motility parameters, including migration path, distance, rate, and directional persistence, were obtained from time-lapse movies. Cells were manually traced for each frame using Metamorph to track the migration path of individual cells. The migration paths were expressed as graphs using the Microsoft Excel program. The velocity of cell migration was calculated as a ratio of the total length of migration paths and the duration of migration. The migration distances were determined as the net translocation during a 120-min period. The directional persistence was calculated as a ratio of the direct distance during a 120-min period and the total length of the migration path.

**Cdc42 and Rac1 Pull-Down Assays.** Briefly, 100,000–200,000 cells were plated in 60-mm dishes, infected with indicated constructs for 48 h, serum-starved for 24 h, then TGF- $\beta$ 1-treated for the indicated times, lysed in 200 mM NaCl, 50 mM Tris (pH 7.5), 10 mM MgCl<sub>2</sub>, 1% Nonidet P-40, 5% glycerol, and protease inhibitors 50  $\mu$ g/mL pepstatin, 100  $\mu$ g/mL leupeptin, and 1 mM PMSF. The cell lysates were cleared after lysis and 5% of lysate used to assess total Cdc42 and Rac1. The remaining lysate was incubated with 25  $\mu$ g of PAK-CRIB coupled to glutathione-Sepharose 4B beads for 1 h with tumbling at 4  $^{\circ}$ C. The beads were washed, resuspended in SDS/PAGE sample buffer, and analyzed by Western blot with anti-Cdc42 antibody or anti-Rac1 antibody.

**Reverse Transcription and PCR.** RNA was isolated from cells using the RNeasy kit (Qiagen), reverse-transcribed using an oligodT primer (Invitrogen), and then PCR was performed using primers specific for GAPDH, N-cadherin, Slug, Vimentin, and type III TGF- $\beta$  receptor (T $\beta$ RIII) as described elsewhere (4). The products were analyzed on a 2% agarose gel, and images were acquired with a Bio-Rad Gel Doc. All assays were performed at least 3 times and results from 1 experiment are provided.

1. Edlund S, Landstrom M, Heldin CH, Aspenstrom P (2002) Transforming growth factor beta-induced mobilization of actin cytoskeleton requires signaling by small GTPases Cdc42 and RhoA. *Mol Biol Cell* 13:902–914.
2. Bayless KJ, Davis GE (2002) The Cdc42 and Rac1 GTPases are required for capillary lumen formation in three-dimensional extracellular matrices. *J Cell Sci* 115:1123–1136.
3. Girnita L, et al. (2007) Beta-arrestin and Mdm2 mediate IGF-1 receptor-stimulated ERK activation and cell cycle progression. *J Biol Chem* 282:11329–11338.

4. Gordon KJ, Dong M, Chislock EM, Fields TA, Blobel GC (2008) Loss of type III transforming growth factor beta receptor expression increases motility and invasiveness associated with epithelial to mesenchymal transition during pancreatic cancer progression. *Carcinogenesis* 29:252–262.





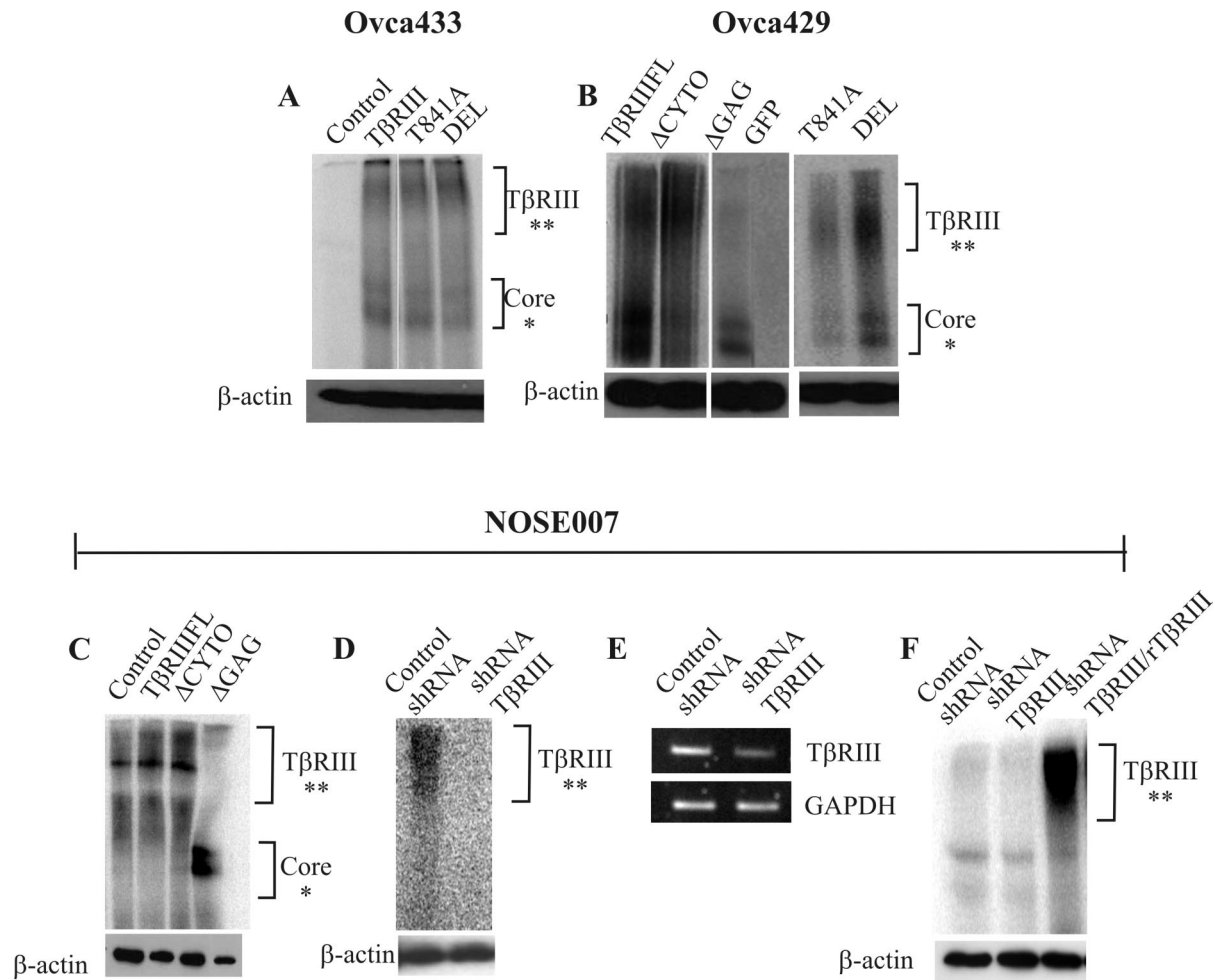

**Fig. S3.** Verification of TβRIII expression, TβRIII knockdown, and rescue. (A–C) Verification of expression of TβRIII constructs in Ovca433 (A), Ovca429 (B), and NOSE007 cells (C). Forty-eight hours after infecting with adenovirus-expressing GFP-tagged construct TβRIIIFL, TβRIIIΔCYTO, TβRIIIΔGAG, TβRIII-T841A (TβRIII mutant unable to bind β-arrestin2), TβRIII-DEL (TβRIII mutant unable to bind GIPC), or GFP alone as control, expression was detected by <sup>125</sup>I-TGF-β1 binding and crosslinking. Lanes in B are from the same experiment and same exposure but have been rearranged for clarity. \*, position of the TβRIII protein core; \*\*, TβRIII protein containing glycosaminoglycan modifications. (D–E) Verification of shRNA-mediated silencing of TβRIII expression. The effect of shRNA-TβRIII relative to shRNA NTC (control shRNA) on cell surface TβRIII expression in NOSE007 cells; 72 h after infecting with adenovirus-expressing, these constructs and dsRed followed by lysis and immunoprecipitation with antibody to TβRIII followed by detection by <sup>125</sup>I-TGF-β1 binding and crosslinking. (E) Reverse transcription and RT-PCR for TβRIII was carried out as stated in *Materials and Methods* to verify knockdown of TβRIII expression at the mRNA level. GAPDH was used as a control. (F) Rescue of cell-surface expression of rat TβRIII (rTβRIII) after shRNA-mediated silencing of TβRIII expression. Forty-eight hours after infection with shRNA-TβRIII, cells were infected with rTβRIII for an additional 48 h and cell-surface expression was verified by <sup>125</sup>I-TGF-β1 binding and crosslinking. In all cases β-actin was used as a loading control.









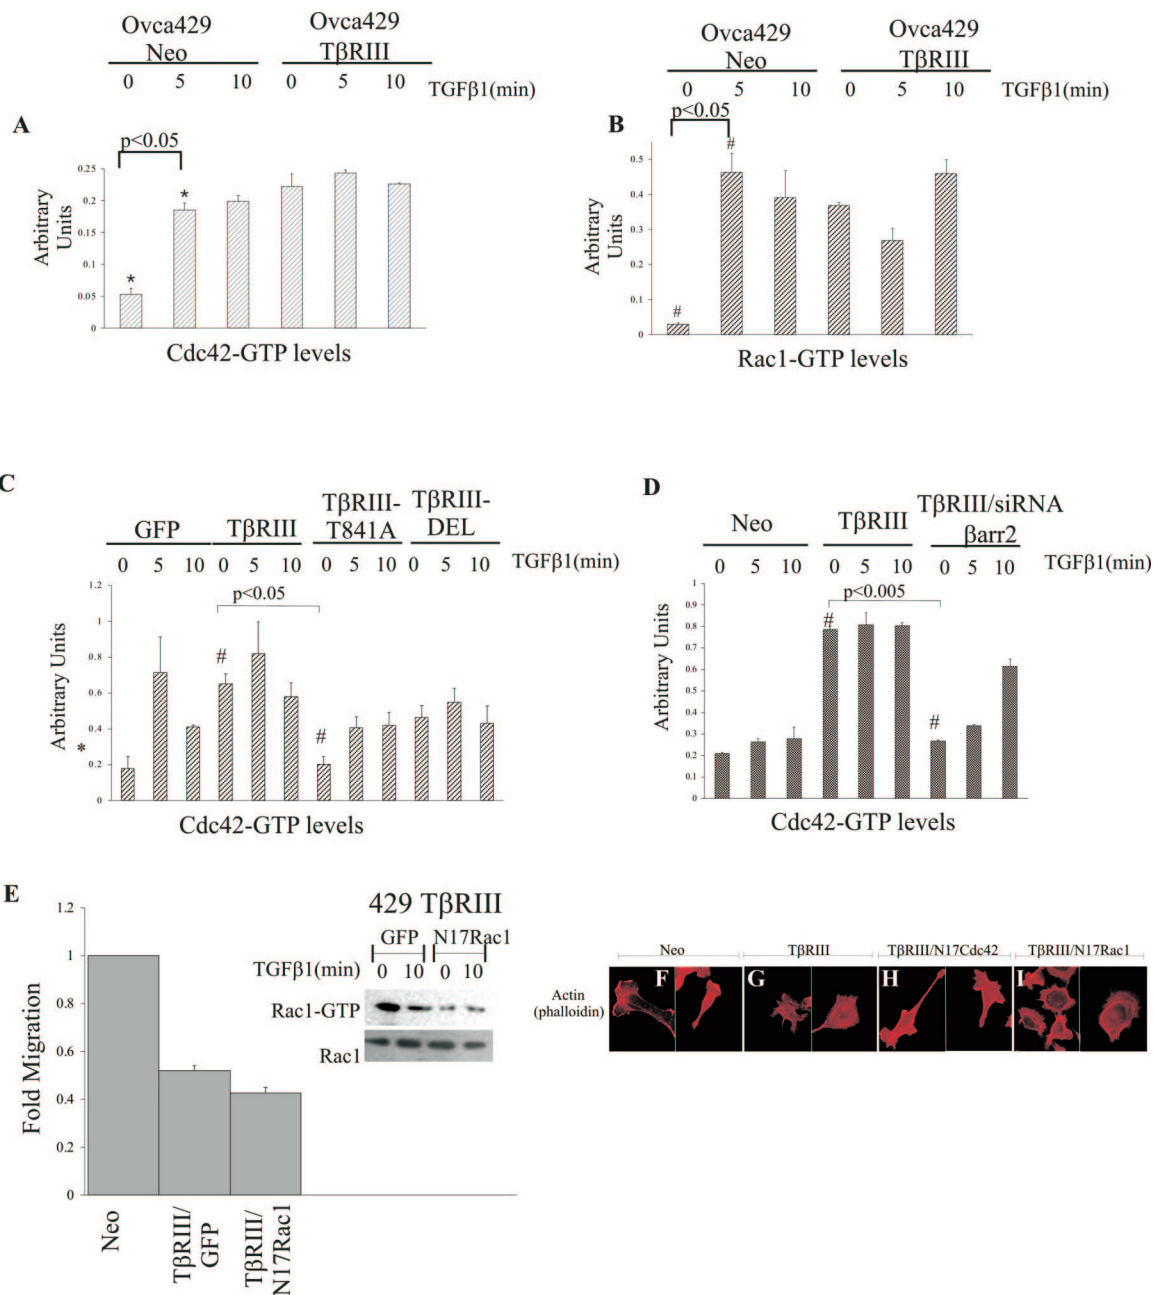

**Fig. 57.** TβRIII inhibits motility through constitutive activation of Cdc42. Ovca429Neo and Ovca429TβRIII cell lines were serum-starved for 16 h followed by stimulation with TGF-β1 (200 pM) for the times indicated and pull-down assays for active Cdc42 and Rac1 were performed. Five percent of lysate was assessed for effects on total Cdc42 and Rac1 levels. Quantification of amount of active Cdc42 (A) or Rac1 (B) was determined by using ImageJ software and represented as fold-change-normalized to total Cdc42 and Rac1. The graph is the average of 2 independent experiments, and columns represent mean ± SE (\*,  $P = 0.0114$  and #,  $P = 0.0156$ ). (C) Forty-eight hours after infecting Ovca429 cells with adenovirus-expressing GFP, TβRIIIFL, TβRIII-T841A, or TβRIII-DEL cells were serum-starved for 16 h followed by stimulation with TGF-β1 (200 pM) for the times indicated and pull-down assays for active Cdc42 were conducted. Five percent of lysate was assessed for effects on total Cdc42 levels. Quantification of amount of active Cdc42 was determined by using ImageJ software and is represented as fold-change-normalized to total Cdc42. The graph is the average of 2 independent experiments and columns represent mean ± SE (#,  $P = 0.0348$ ). (D) Seventy-two hours after infecting Ovca429 TβRIII cells with either control DNA or siRNAβ-arrestin2, cells were serum-starved and Cdc42-GTP levels determined as described above. Quantitation was performed as described above and is represented as fold-change-normalized to total Cdc42. The graph is the average of 2 independent experiments and columns represent mean ± SE (#,  $P = 0.0034$ ). (E) Efficacy of N17Rac1 was determined by infecting cells as described in *Materials and Methods*. Forty-eight hours after infection, cells were either used for transwell migration assays or serum-starved for 16 h followed by stimulation with TGF-β1 (200 pM) for the times indicated and pull-down assays for active Rac1 and transwell migration assays were conducted as described (*Materials and Methods*). (F–I) Ovca429Neo and Ovca429TβRIII cells infected with adenovirus expressing either GFP-N17Cdc42 (H) or GFP-N17Rac1 (I) were fixed and stained for actin by using rhodamine phalloidin. GFP-expressing cells were examined and representative examples are presented.
